# Supplementary material for: A patient and public involvement (PPI) toolkit for meaningful and flexible involvement in clinical trials – a work in progress
Source: PubMed Central journal article supplement (PMC5611579; doi:10.1186/s40900-016-0029-8), 2016-04-27
Supplement: 40900_2016_29_MOESM1_ESM.pdf [file 40900_2016_29_MOESM1_ESM.pdf]

## Appendix 1 – List of Tools

### Tools (A)

| PPI Activity                    | Tools                                                                                                                                                                                                                        | Developed / in development by CTRC | Requires development | External links |
|---------------------------------|------------------------------------------------------------------------------------------------------------------------------------------------------------------------------------------------------------------------------|------------------------------------|----------------------|----------------|
| Planning PPI                    | PPI planning tool (Appendix 2)                                                                                                                                                                                               | x                                  |                      |                |
|                                 | PPI planning tool guidance (Appendix 3)                                                                                                                                                                                      | x                                  |                      |                |
|                                 | How to Find Public Contributors (Appendix 4)                                                                                                                                                                                 | x                                  |                      |                |
|                                 | CTRC PPI Costing Template                                                                                                                                                                                                    | x                                  |                      |                |
|                                 | INVOLVE cost calculator<br><a href="http://www.invo.org.uk/resource-centre/payment/involvement-cost-calculator/">http://www.invo.org.uk/resource-centre/payment/involvement-cost-calculator/</a>                             |                                    |                      | x              |
|                                 | INVOLVE Budgeting for Involvement<br><a href="http://www.invo.org.uk/wp-content/uploads/2013/07/INVOLVE_MHRNBudgeting09Jul2013.pdf">http://www.invo.org.uk/wp-content/uploads/2013/07/INVOLVE_MHRNBudgeting09Jul2013.pdf</a> |                                    |                      | x              |
|                                 | INVOLVE Guidance on the use of Social Media<br><a href="http://www.invo.org.uk/posttypepublication/guidance-on-the-use-of-social-media/">http://www.invo.org.uk/posttypepublication/guidance-on-the-use-of-social-media/</a> |                                    |                      | x              |
|                                 | GRIPP checklist <sup>8</sup>                                                                                                                                                                                                 |                                    |                      | x              |
|                                 | INVOLVE Diversity and Inclusion Document                                                                                                                                                                                     |                                    |                      | x              |
| PPI in Trial Design             | PPI in Trial Design Question Bank                                                                                                                                                                                            |                                    | x                    |                |
|                                 | Template Study overview – PPI consultation document                                                                                                                                                                          |                                    | x                    |                |
|                                 | Template instructions for providing feedback on trial design                                                                                                                                                                 |                                    | x                    |                |
| Preparing for involvement       | PPI Remit document – Trial Management Group (Appendix 5)                                                                                                                                                                     | x                                  |                      |                |
|                                 | PPI Remit document – Trial Steering Committee (Appendix 6)                                                                                                                                                                   | x                                  |                      |                |
|                                 | PPI Recruitment and Selection resources                                                                                                                                                                                      | x                                  |                      |                |
| Training on PPI for trial teams | PPI Training Needs Analysis for Trial teams                                                                                                                                                                                  |                                    | x                    |                |
|                                 | North West People in Research Forum (NWPIRF) Training, Learning and Development Resource<br><a href="http://www.northwestpeopleinresearchforum.org/training/">http://www.northwestpeopleinresearchforum.org/training/</a>    |                                    |                      | x              |
|                                 | Healthtalkonline clips on PPI in                                                                                                                                                                                             |                                    |                      | x              |

|               |                                                                                                                                                                                                                                                                                                                                                                     |   |  |   |
|---------------|---------------------------------------------------------------------------------------------------------------------------------------------------------------------------------------------------------------------------------------------------------------------------------------------------------------------------------------------------------------------|---|--|---|
|               | Research<br><a href="http://www.healthtalk.org/peoples-experiences/improving-health-care/patient-and-public-involvement-research/what-patient-and-public-involvement-and-why-it-important">http://www.healthtalk.org/peoples-experiences/improving-health-care/patient-and-public-involvement-research/what-patient-and-public-involvement-and-why-it-important</a> |   |  |   |
|               | Relevant areas /activities in the Public Involvement Impact Assessment Framework (PiiAF)<br><a href="http://piiaf.org.uk/">http://piiaf.org.uk/</a>                                                                                                                                                                                                                 |   |  | x |
|               | INVOLVE Public involvement in clinical trials:<br>Supplement to the briefing notes for researchers<br><a href="http://www.nihr.ac.uk/get-involved/INVOLVEpublicinvolvementinclinicaltrialsBriefingnotes2012.pdf">http://www.nihr.ac.uk/get-involved/INVOLVEpublicinvolvementinclinicaltrialsBriefingnotes2012.pdf</a>                                               |   |  | x |
|               | Patient and Public Involvement How to guide:<br><a href="http://www.rds-nw.nihr.ac.uk/public-involvement/how-to-guide/">http://www.rds-nw.nihr.ac.uk/public-involvement/how-to-guide/</a>                                                                                                                                                                           |   |  | x |
|               | Links to relevant webinars E.g The COMET initiative:<br><a href="http://www.comet-initiative.org/resources/publicinvolvement">http://www.comet-initiative.org/resources/publicinvolvement</a>                                                                                                                                                                       |   |  | x |
| PPI Recording | PPI recording tool                                                                                                                                                                                                                                                                                                                                                  | x |  |   |

## Tools (B)

| PPI Activity                  | Link to PPI resources                                                                                                                                                                                                                | Developed / in development | Requires development | External links |
|-------------------------------|--------------------------------------------------------------------------------------------------------------------------------------------------------------------------------------------------------------------------------------|----------------------------|----------------------|----------------|
| PPI Recruitment and selection | Suite of PPI recruitment and selection resources                                                                                                                                                                                     | x                          |                      |                |
|                               | Equality and Diversity Policy for PPI                                                                                                                                                                                                | x                          |                      |                |
| Welcoming public contributors | Welcome meeting template agenda                                                                                                                                                                                                      | x                          |                      |                |
|                               | INVOLVE Public Information Pack including the Jargon Buster<br><a href="http://www.invo.org.uk/posttypepublication/the-public-information-pack-pip/">http://www.invo.org.uk/posttypepublication/the-public-information-pack-pip/</a> |                            |                      | x              |
|                               | Induction template and materials                                                                                                                                                                                                     |                            | x                    |                |
|                               | TwoCan Associates for the UKCRC                                                                                                                                                                                                      |                            |                      | x              |

|                                          |                                                                                                                                                                                                                                                                                                                                                                                                                           |   |  |   |
|------------------------------------------|---------------------------------------------------------------------------------------------------------------------------------------------------------------------------------------------------------------------------------------------------------------------------------------------------------------------------------------------------------------------------------------------------------------------------|---|--|---|
|                                          | and NCRI (2010) Patient and public involvement (PPI) in research groups – Guidance for Chairs.<br><a href="http://www.crn.nihr.ac.uk/wp-content/uploads/GuidanceforCSGC_hairs.pdf">http://www.crn.nihr.ac.uk/wp-content/uploads/GuidanceforCSGC_hairs.pdf</a>                                                                                                                                                             |   |  |   |
| PPI in Participant Information Resources | Training on producing participant information sheets and consent forms                                                                                                                                                                                                                                                                                                                                                    | x |  |   |
|                                          | Template participant information sheet & consent form (structure and layout)                                                                                                                                                                                                                                                                                                                                              | x |  |   |
|                                          | Participant information review - Question bank (Appendix 7)                                                                                                                                                                                                                                                                                                                                                               | x |  |   |
|                                          | Participant information review – Guidance for Public Contributors (Appendix 8)                                                                                                                                                                                                                                                                                                                                            | x |  |   |
| Public contributor training resources    | Information for clinical trials teams                                                                                                                                                                                                                                                                                                                                                                                     |   |  |   |
|                                          | INVOLVE – Developing Training and Support resource<br><a href="http://www.invo.org.uk/resource-centre/training-resource/">http://www.invo.org.uk/resource-centre/training-resource/</a>                                                                                                                                                                                                                                   |   |  | x |
|                                          | Links to the NWPIRF Training database -<br><a href="http://www.northwestpeopleinresearchforum.org/training/">http://www.northwestpeopleinresearchforum.org/training/</a>                                                                                                                                                                                                                                                  |   |  | x |
|                                          | Information for patients                                                                                                                                                                                                                                                                                                                                                                                                  |   |  |   |
|                                          | Links to relevant webinars & plain language summaries eg. COMET plain language summaries<br><a href="http://www.comet-initiative.org/resources/PlainLanguageSummary">http://www.comet-initiative.org/resources/PlainLanguageSummary</a><br>and Cochrane – What are systematic reviews?<br><a href="http://cccr.org/cochrane.org/what-are-systematic-reviews">http://cccr.org/cochrane.org/what-are-systematic-reviews</a> |   |  | x |
|                                          | What to look for in a research application – A guide for lay reviewers: <a href="http://clahrc-peninsula.nihr.ac.uk/uploads/attachments/PPI/Guide-to-lay-reviewing.pdf">http://clahrc-peninsula.nihr.ac.uk/uploads/attachments/PPI/Guide-to-lay-reviewing.pdf</a>                                                                                                                                                         |   |  | x |
|                                          | Building Research Partnerships<br><a href="http://www.macmillan.org.uk/researchlearning">www.macmillan.org.uk/researchlearning</a>                                                                                                                                                                                                                                                                                        |   |  |   |
|                                          | EUPATI Patient Advocate Toolbox (when available) & webinars                                                                                                                                                                                                                                                                                                                                                               |   |  | x |
|                                          | Center Watch Glossary of Clinical Trials Terms -<br><a href="http://www.centerwatch.com/heal">http://www.centerwatch.com/heal</a>                                                                                                                                                                                                                                                                                         |   |  | x |

|                |                                                                                                                                                                                                                                                                                                                                                            |   |   |   |
|----------------|------------------------------------------------------------------------------------------------------------------------------------------------------------------------------------------------------------------------------------------------------------------------------------------------------------------------------------------------------------|---|---|---|
|                | <a href="#">th-resources/glossary/</a>                                                                                                                                                                                                                                                                                                                     |   |   |   |
|                | Critical Appraisal Skills Programme e-learning resources:<br><a href="http://www.casp-uk.net/#!/checklists/cb36">http://www.casp-uk.net/#!/checklists/cb36</a>                                                                                                                                                                                             |   |   | x |
| Supporting PPI | CTRC Process for Making PPI Payments Resource                                                                                                                                                                                                                                                                                                              | x |   |   |
|                | INVOLVE (2010) Payment for involvement: A guide for making payments to members of the public actively involved in NHS, public health and social care research (resource currently being updated):<br><a href="http://www.invo.org.uk/posttypepublication/payment-for-involvement/">http://www.invo.org.uk/posttypepublication/payment-for-involvement/</a> |   |   | x |
|                | INVOLVE What you need to know about payment (for public contributors)<br><a href="http://www.invo.org.uk/posttypepublication/what-you-need-to-know-about-payment/">http://www.invo.org.uk/posttypepublication/what-you-need-to-know-about-payment/</a>                                                                                                     |   |   | x |
|                | Top Tips for Maintaining PPI Interest in a Trial Resource                                                                                                                                                                                                                                                                                                  |   | x |   |
|                | Guidance on providing feedback and ongoing acknowledgement and support to public contributors                                                                                                                                                                                                                                                              |   | x |   |
|                | Public contributor into trials newsletter                                                                                                                                                                                                                                                                                                                  |   | x |   |
|                | Template PPI evaluation and impact document                                                                                                                                                                                                                                                                                                                |   | x |   |
|                | Instructions on use of the evaluation and impact document                                                                                                                                                                                                                                                                                                  |   | x |   |
|                | Dealing with difficulties with PPI                                                                                                                                                                                                                                                                                                                         |   | x |   |

## Tools (C)

| PPI Activity                        | Link to PPI resources                                                                         | Developed / in development | Requires development | External links |
|-------------------------------------|-----------------------------------------------------------------------------------------------|----------------------------|----------------------|----------------|
| Maintaining PPI interest in a Trial | Top Tips for Maintaining PPI Interest in a Trial Resource                                     |                            | x                    |                |
|                                     | Guidance on providing feedback and ongoing acknowledgement and support to public contributors |                            | x                    |                |
|                                     | Public contributor newsletter                                                                 |                            | x                    |                |
| Evaluating PPI Experience           | Template evaluation document                                                                  | x                          |                      |                |

|           |                                                                       |  |   |  |
|-----------|-----------------------------------------------------------------------|--|---|--|
| Resources |                                                                       |  |   |  |
|           | Process of disseminating / returning / responding to evaluation forms |  | x |  |

## Tools (D)

| PPI Activity                                   | Link to PPI resources                                                                                                                                                                                             | Developed / in development | Requires development | External links |
|------------------------------------------------|-------------------------------------------------------------------------------------------------------------------------------------------------------------------------------------------------------------------|----------------------------|----------------------|----------------|
| PPI into Written Study Dissemination Resources | Return of Results Guidance Document and Toolkit:<br><a href="http://mrctcenter.org/return-results">http://mrctcenter.org/return-results</a>                                                                       |                            |                      | x              |
|                                                | Template End of Study participant information and Public Information on Study Results (for structure and layout)                                                                                                  |                            | x                    |                |
|                                                | Question bank for consulting over End of Study Participant Information and Public Information on Study Results – examples of questions to ask public contributors when asking for comments on these two documents |                            | x                    |                |
|                                                | Template PPI Feedback Reviewer Information Sheet                                                                                                                                                                  |                            | x                    |                |
|                                                | Critical Appraisal Skills Programme (CASPP guidance for public contributors)                                                                                                                                      |                            |                      | x              |
| Dissemination of PPI Activities                | GRIPP checklist <sup>8</sup> checklist for reporting on PPI activities                                                                                                                                            |                            |                      | x              |
| Public Contributor Presenter Resource          | Guidance on preparing a Public Contributor for a role in presenting study results                                                                                                                                 |                            | x                    |                |
| Ending PPI Resource                            | Top tips on ending PPI well                                                                                                                                                                                       |                            | x                    |                |
