# Supplementary material for: A patient and public involvement (PPI) toolkit for meaningful and flexible involvement in clinical trials – a work in progress
Source: PubMed Central journal article supplement (PMC5611579; doi:10.1186/s40900-016-0029-8), 2016-04-27
Supplement: 40900_2016_29_MOESM2_ESM.pdf [file 40900_2016_29_MOESM2_ESM.pdf]

|                                                       | Which PPI options have been used to answer this question |                                       |                                                      |                                       |                                                                |                                       |                |                                       |
|-------------------------------------------------------|----------------------------------------------------------|---------------------------------------|------------------------------------------------------|---------------------------------------|----------------------------------------------------------------|---------------------------------------|----------------|---------------------------------------|
| How will you assess the impact of public involvement? | Public contributor/s on Trial Management Group           | Impact of public involvement activity | Consultation with small group of public contributors | Impact of public involvement activity | Consultation / survey with larger group of public contributors | Impact of public involvement activity | Other, specify | Impact of public involvement activity |
|                                                       |                                                          |                                       |                                                      |                                       |                                                                |                                       |                |                                       |
|                                                       |                                                          |                                       |                                                      |                                       |                                                                |                                       |                |                                       |
|                                                       |                                                          |                                       |                                                      |                                       |                                                                |                                       |                |                                       |
|                                                       |                                                          |                                       |                                                      |                                       |                                                                |                                       |                |                                       |
